# Supplementary material for: Phase-transfer-assisted confined growth of mesoporous MoS2@graphene van der Waals supraparticles for unprecedented ultrahigh-rate sodium storage
Source: Royal Society of Chemistry journal article supplement (doi:10.1039/d1ta00715g), 2021-01-01
Supplement: d1ta00715g1.pdf [file d1ta00715g1.pdf]

**Electronic Supporting Information**

**Phase-transfer-assisted confinement growth of mesoporous MoS<sub>2</sub>@graphene  
van der Waals supraparticles for unprecedented ultrahigh-rate sodium storage**

Wenqian Han,<sup>a</sup> Guannan Guo,<sup>b</sup> Yan Xia,<sup>b</sup> Jing Ning,<sup>a</sup> Yuwei Deng,<sup>a</sup> Wei Li,<sup>a</sup> Dong Yang,<sup>\*b</sup> and Angang Dong<sup>\*a</sup>

<sup>a</sup>Shanghai Key Laboratory of Molecular Catalysis and Innovative Materials and Department of Chemistry, Fudan University, Shanghai 200433, China.

<sup>b</sup>State Key Laboratory of Molecular Engineering of Polymers and Department of Macromolecular Science, Fudan University, Shanghai 200433, China.

\* Corresponding authors.

Email addresses: [agdong@fudan.edu.cn](mailto:agdong@fudan.edu.cn) (A. Dong), [yangdong@fudan.edu.cn](mailto:yangdong@fudan.edu.cn) (D. Yang)

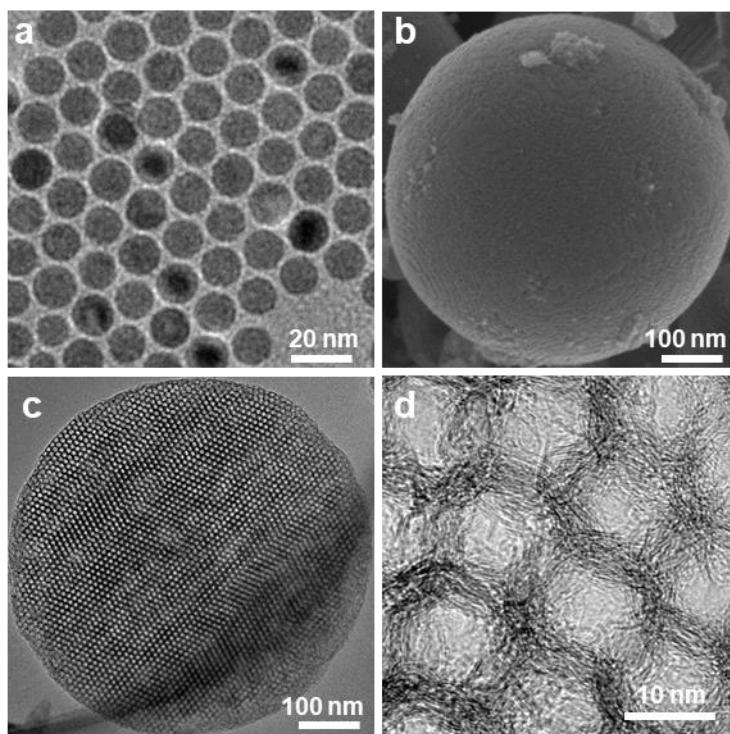

**Fig. S1** (a) TEM image of  $\text{Fe}_3\text{O}_4$  nanocrystals used for assembling superlattices. (b) SEM image of  $\text{Fe}_3\text{O}_4$  nanocrystal supraparticles obtained by an emulsion-based assembly process. (c) TEM and (d) HRTEM images of mesoporous graphene supraparticles derived from  $\text{Fe}_3\text{O}_4$  nanocrystal superlattices.

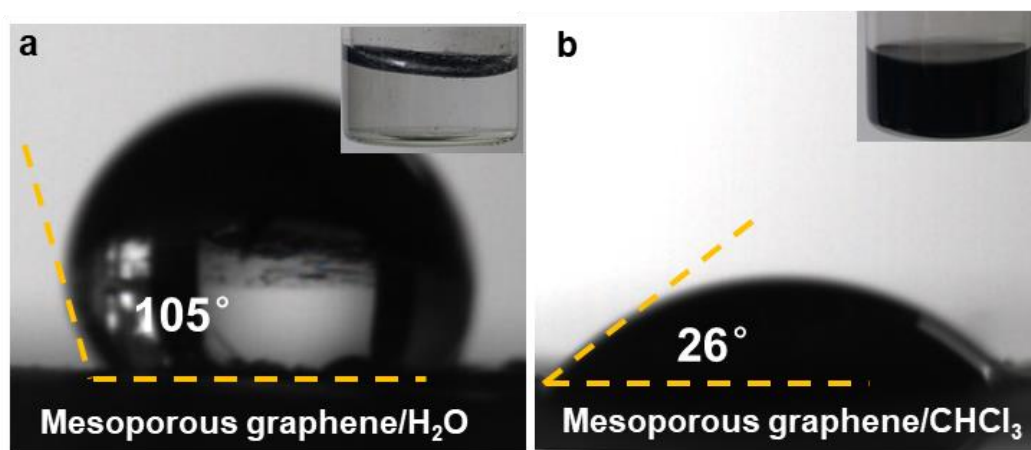

**Fig. S2** Contact angle measurements of mesoporous graphene supraparticles with the solvent of (a) H<sub>2</sub>O and (b) CHCl<sub>3</sub>, confirming their hydrophobicity. Insets show the photographs of mesoporous graphene supraparticles dispersed in H<sub>2</sub>O and CHCl<sub>3</sub>, respectively.

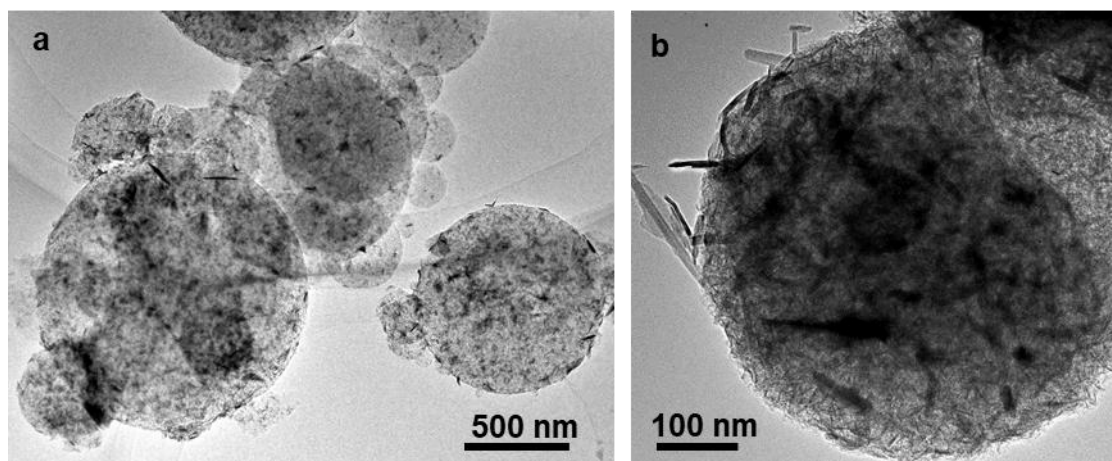

**Fig. S3** (a, b) TEM images of the product resulting the impregnation of  $(\text{NH}_4)_2\text{MoS}_4$  assisted by tuning the solvent polarity followed by calcination, showing the limited confinement growth of  $\text{MoS}_2$  nanosheets within the graphitic framework.

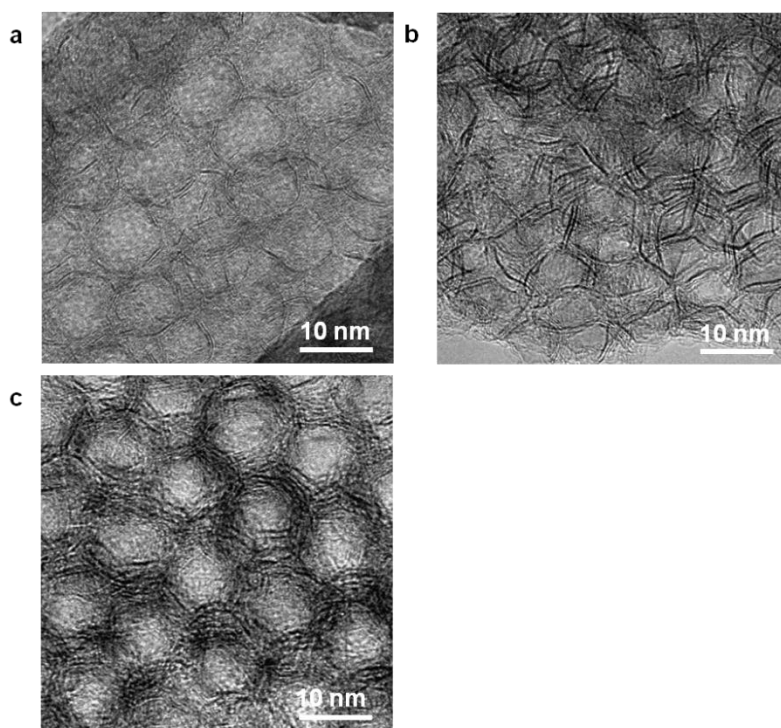

**Fig.S4** (a-c) TEM images of MoS<sub>2</sub>@graphene with the MoS<sub>2</sub> layer number ranging from 1L to 3L.

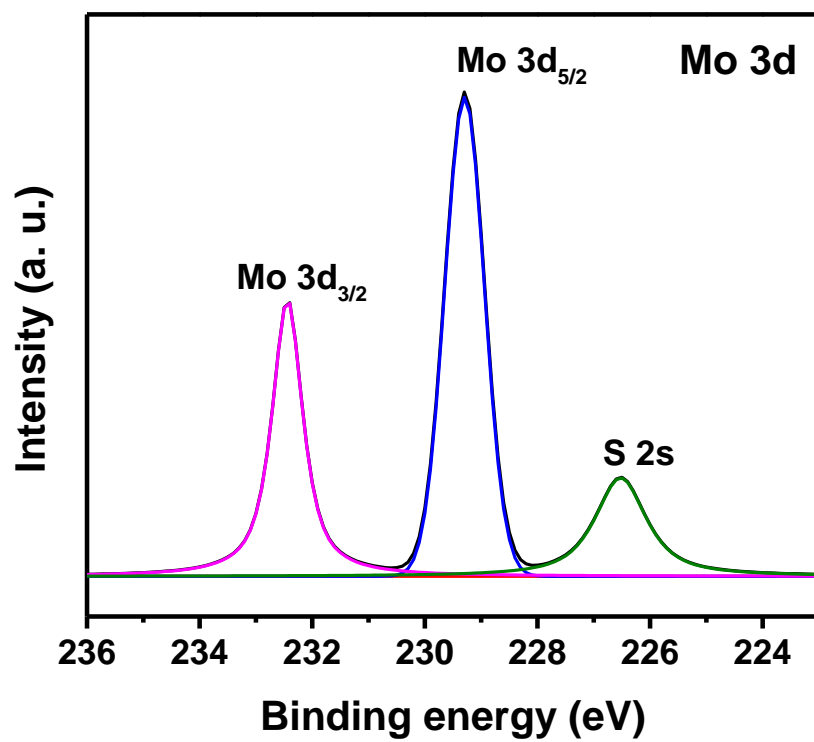

Fig.S5 Mo 3d XPS spectrum of MoS<sub>2</sub>@graphene supraparticles.

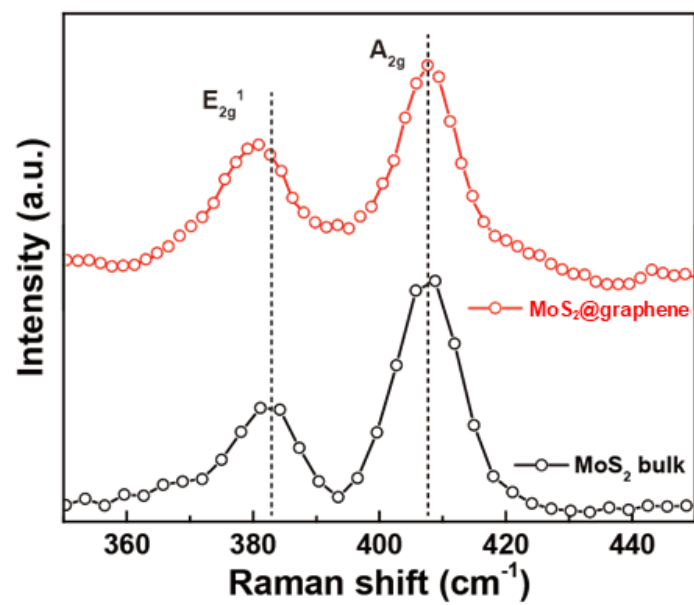

**Fig.S6** Raman spectra of MoS<sub>2</sub>@graphene supraparticles and bulk MoS<sub>2</sub>.

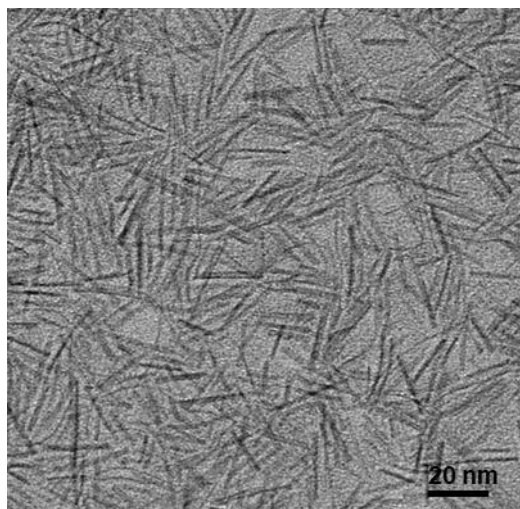

**Fig. S7** Typical TEM image of colloidal MoS<sub>2</sub> nanoflakes.



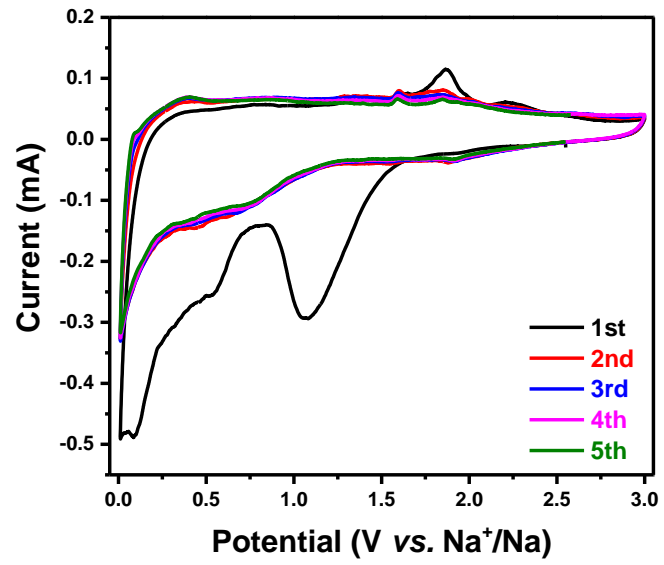

Fig. S8 CV curves of MoS<sub>2</sub>@graphene supraparticles.

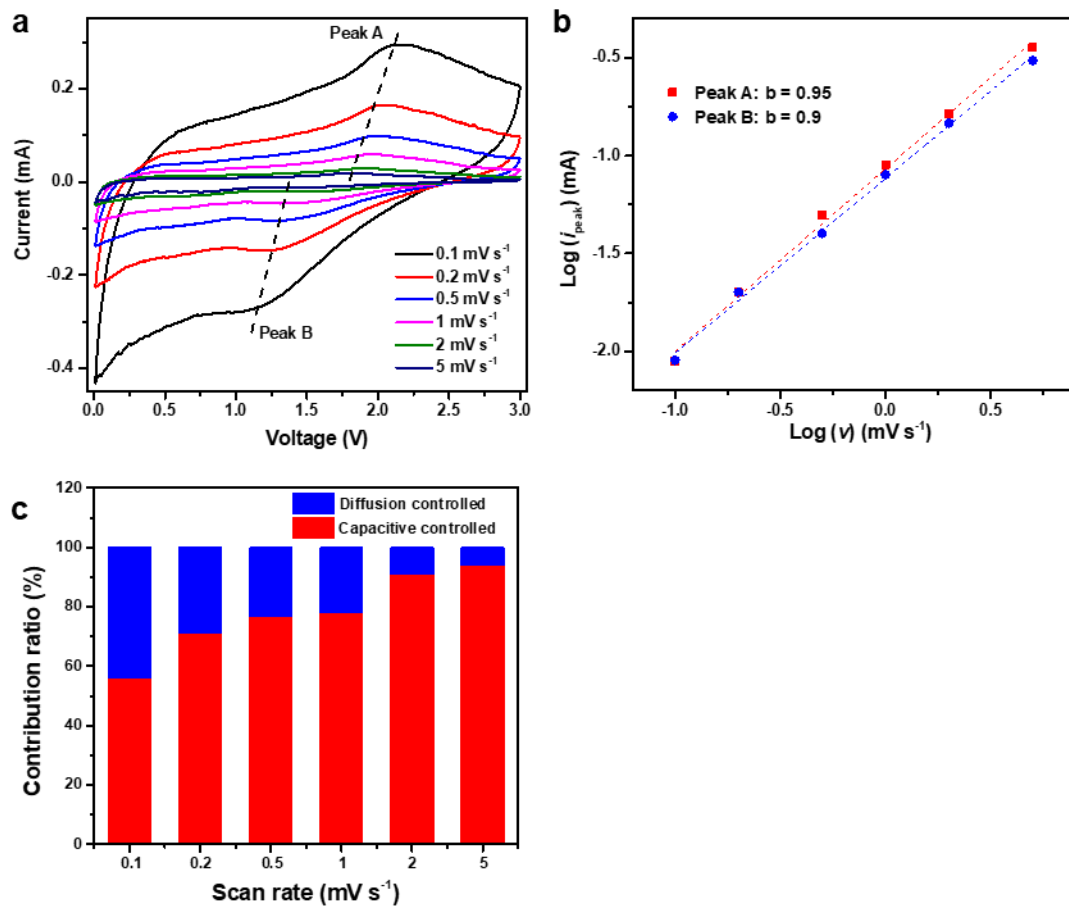

**Fig.S9** (a) CV curves of MoS<sub>2</sub>@graphene supraparticles at scan rates (*v*) ranging from 0.1 to 5 mV s<sup>-1</sup>. (b) Plots of log(*i*) versus log(*v*) for the cathodic and anodic peaks shown in (a). (c) Normalized contribution ratios of capacitive and diffusion capacities at different scan rates.

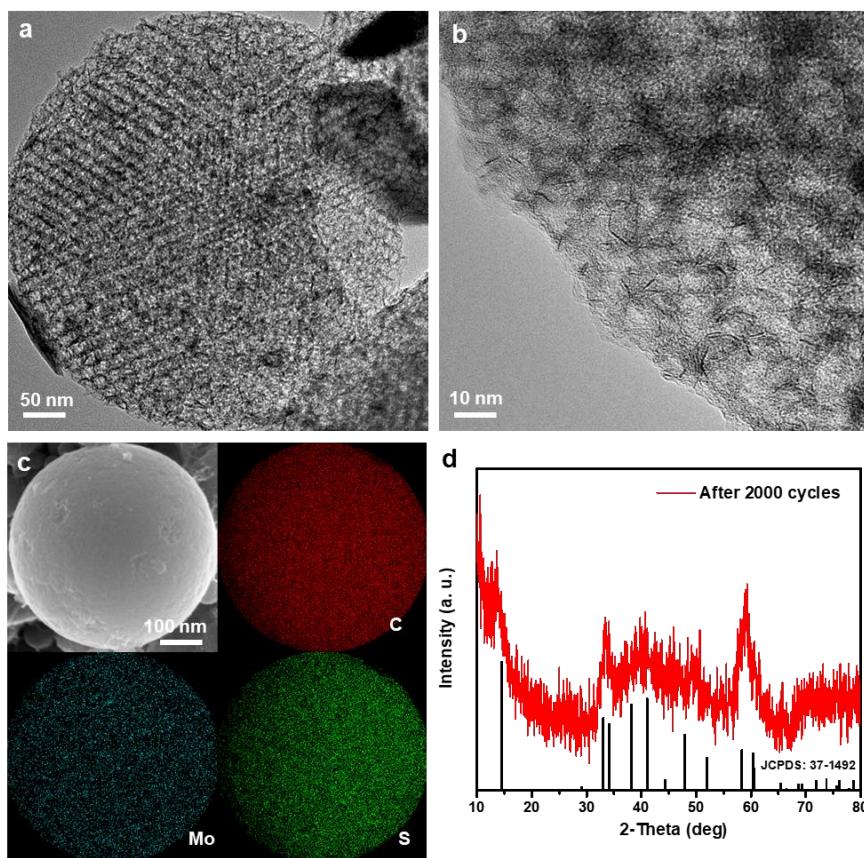

**Fig.S10** Structural characterization of MoS<sub>2</sub>@graphene supraparticles after 2000 cycles. (a) TEM image, (b) HRTEM image, (c) STEM image and corresponding elemental mapping, and (d) XRD pattern.

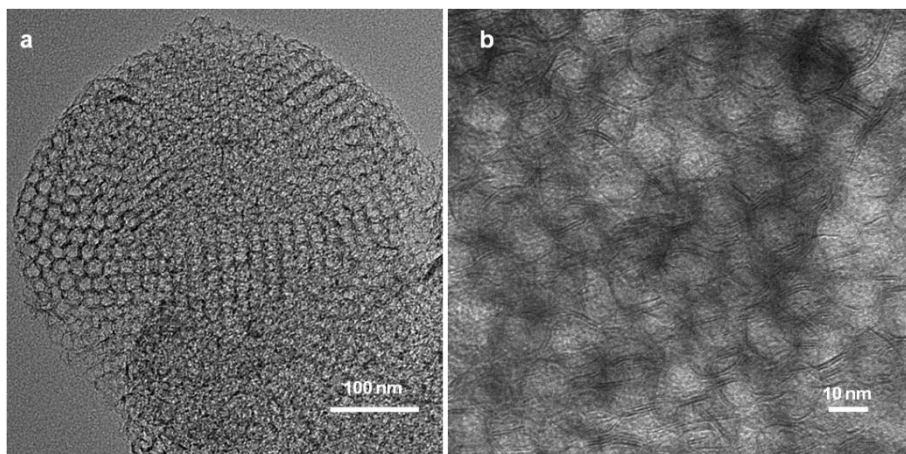

**Fig. S11** (a, b) Typical TEM images of WS<sub>2</sub>@graphene supraparticles.

**Table S1.** SIB performance comparison between MoS<sub>2</sub>@graphene supraparticles and representative state-of-the-art 2H-MoS<sub>2</sub> anode materials reported previously.

| <b>Anodes</b>                                                     | <b>Voltage range (V)</b> | <b>Current density (A g<sup>-1</sup>)/cycle number/capacity retention (mAh g<sup>-1</sup>)</b> | <b>Ref.</b> |
|-------------------------------------------------------------------|--------------------------|------------------------------------------------------------------------------------------------|-------------|
| MoS <sub>2</sub> @graphene supraparticles                         | 0.01-3                   | 10/2000/309                                                                                    | This work   |
| 3D MoS <sub>2</sub> -graphene spheres                             | 0.01-3                   | 1.5/600/322                                                                                    | [1]         |
| MoS <sub>2</sub> manosheets                                       | 0.01-3                   | 0.04/100/386                                                                                   | [2]         |
| MoS <sub>2</sub> @graphene nanoribbons                            | 0.01-3                   | 5/1500/158                                                                                     | [3]         |
| MoS <sub>2</sub> nanosheets@MOFs                                  | 0.01-3                   | 1/1000/265                                                                                     | [4]         |
| MoS <sub>2</sub> /graphene nanosheets                             | 0.01-3                   | 0.3/250/421                                                                                    | [5]         |
| Porous MoS <sub>2</sub> /carbon spheres                           | 0.01-3                   | 2/1000/416                                                                                     | [6]         |
| MoS <sub>2</sub> @carbon nanofiber interpenetrated graphene       | 0.01-3                   | 1/1000/412                                                                                     | [7]         |
| Crystalline MoS <sub>2</sub> nanosheets                           | 0.01-3                   | 2/800/337                                                                                      | [8]         |
| C@MoS <sub>2</sub> @PPy composites                                | 0.01-3                   | 5/294/500                                                                                      | [9]         |
| MoS <sub>2</sub> nanosheets confined in N-doped mesoporous carbon | 0.01-3                   | 1/300/200                                                                                      | [10]        |
| MoS <sub>2</sub> /graphene hybrids                                | 0.01-3                   | 0.1/150/415                                                                                    | [11]        |
| Exfoliated MoS <sub>2</sub> nanosheets                            | 0.01-3                   | 0.1/100/385                                                                                    | [12]        |

## References

- 1 S.H. Choi, Y.N. Ko, J. Lee and Y.C. Kang, *Adv. Funct. Mater.*, 2015, **25**, 1780-1788.
- 2 D. Su, S. Dou and G. Wang, *Adv. Energy Mater.*, 2015, **5**, 1401205.
- 3 Y. Liu, X. Wang, X. Song, Y. Dong, L. Yang, L. Wang, D. Jia, Z. Zhao and J. Qiu, *Carbon*, 2016, **109**, 461-471.
- 4 W. Ren, H. Zhang, C. Guan and C. Cheng, *Adv. Funct. Mater.*, 2017, **27**, 1702116.
- 5 D. Sun, D. Ye, P. Liu, Y. Tang, J. Guo, L. Wang and H. Wang, *Adv. Energy Mater.*, 2018, **8**, 1702383.
- 6 B. Chen, H. Lu, J. Zhou, C. Ye, C. Shi, N. Zhao and S. Qiao, *Adv. Energy Mater.*, 2018, **8**, 1702909.
- 7 M. Liu, P. Zhang, Z. Qu, Y. Yan, C. Lai, T. Liu and S. Zhang, *Nat. Commun.*, 2019, **10**.
- 8 T. Wu, M. Jing, Y. Liu and X. Ji, *J. Mater. Chem. A*, 2019, **7**, 6439-6449.
- 9 G. Wang, X. Bi, H. Yue, R. Jin, Q. Wang, S. Gao and J. Lu, *Nano Energy*, 2019, **60**, 362-370.
- 10 M. Hou, Y. Qiu, G. Yan, J. Wang, D. Zhan, X. Liu, J. Gao and L. Lai, *Nano Energy*, 2019, **62**, 299-309.
- 11 M. Feng, M. Zhang, H. Zhang, X. Liu and H. Feng, *Carbon*, 2019, **153**, 217-224.
- 12 Y. Li, K. Chang, E. Shangguan, D. Guo, W. Zhou, Y. Hou, H. Tang, B. Li and Z. Chang, *Nanoscale*, 2019, **11**, 1887-1900.
